# Supplementary material for: bHLH Transcription Factor NtMYC2a Regulates Carbohydrate Metabolism during the Pollen Development of Tobacco (Nicotiana tabacum L. cv. TN90)
Source: MDPI journal article supplement (doi:10.3390/plants11010017), 2021-12-22
Supplement: s1 [file s1]

## Supplementary Material

# **bHLH Transcription Factor NtMYC2a Regulates the Carbohydrate Metabolism During Pollen Development in Tobacco (*Nicotiana tabacum* L. cv. TN90)**

Shiquan Bian <sup>1</sup>, Tian Tian <sup>1</sup>, Yongqiang Ding <sup>1</sup>, Ning Yan <sup>1</sup>, Chunkai Wang <sup>1</sup>, Ning Fang <sup>1</sup>, Yanhua Liu <sup>1</sup>, Zhongfeng Zhang <sup>1</sup> and Hongbo Zhang <sup>1,\*</sup>

<sup>1</sup> Tobacco Research Institute of Chinese Academy of Agricultural Sciences, Qingdao 266101, China; bsq20200130@163.com (B.S.); tiantian01@caas.cn (T.T.); dyq910420@163.com (D.Y.); yanning@caas.cn (N.Y.); wangchunkai1990@outlook.com (W.C.); fangning010@163.com (F.N.); liuyanhua@caas.cn (L.Y); zhangzhongfeng@caas.cn (Z.Z.)

\* Correspondence: zhanghongbo@caas.cn (Z.H.)

**Supplementary Table S1: List of primers used in this study**

| Gene           | GenBank Accession | Primers                                                                 | Primer Use                                        |
|----------------|-------------------|-------------------------------------------------------------------------|---------------------------------------------------|
| <i>NtMYC2a</i> | LOC107820916      | 5'-aaaCCGCGGATGACTGATTACAGCTTACCCA-3'<br>5'-GCGTGTTTCAGCAACTCTGGAT-3'   | For constructing pBin- <i>NtMYC2a</i> -HA vector  |
| <i>NtMYC2a</i> | LOC107820916      | 5'-aaaCCGCGGATGACTGATTACAGCTTACCCA-3'<br>5'-GGAAGCCCACTTCCGTTAACAAAC-3' | For constructing pBin- <i>NtMYC2a</i> Δ-RI vector |
| <i>NtMYC2a</i> | LOC107820916      | 5'-TCACCCATTTCTCTCTCTCTC-3'<br>5'-GAGGTAACAGCAGCAGTAGTAG-3'             | For RT-qPCR                                       |
| <i>AGPs</i>    | AB018190          | 5'-GCTTTCTACAATGCCAATTGG-3'<br>5'-ACTGTCTGTGACATCGGCAT-3'               |                                                   |
| <i>SS2</i>     | JX264160          | 5'-GGCATACTGCTTTATTGCCA-3'<br>5'-TGGTGGAAGATCTACGTATGAAA-3'             |                                                   |
| <i>BAM1</i>    | KF420482          | 5'-AGCGTGTCAAGCACTAATGG-3'<br>5'-CTGTCCAACGGCATCATAAC-3'                |                                                   |
| <i>NtActin</i> | X63603            | 5'-CCACACAGGTGTGATGGTTG-3'<br>5'-GTGGCTAACACCATCACCAG-3'                |                                                   |

**Supplementary Figure S1: pBin-*NtMYC2a*-HA vector**

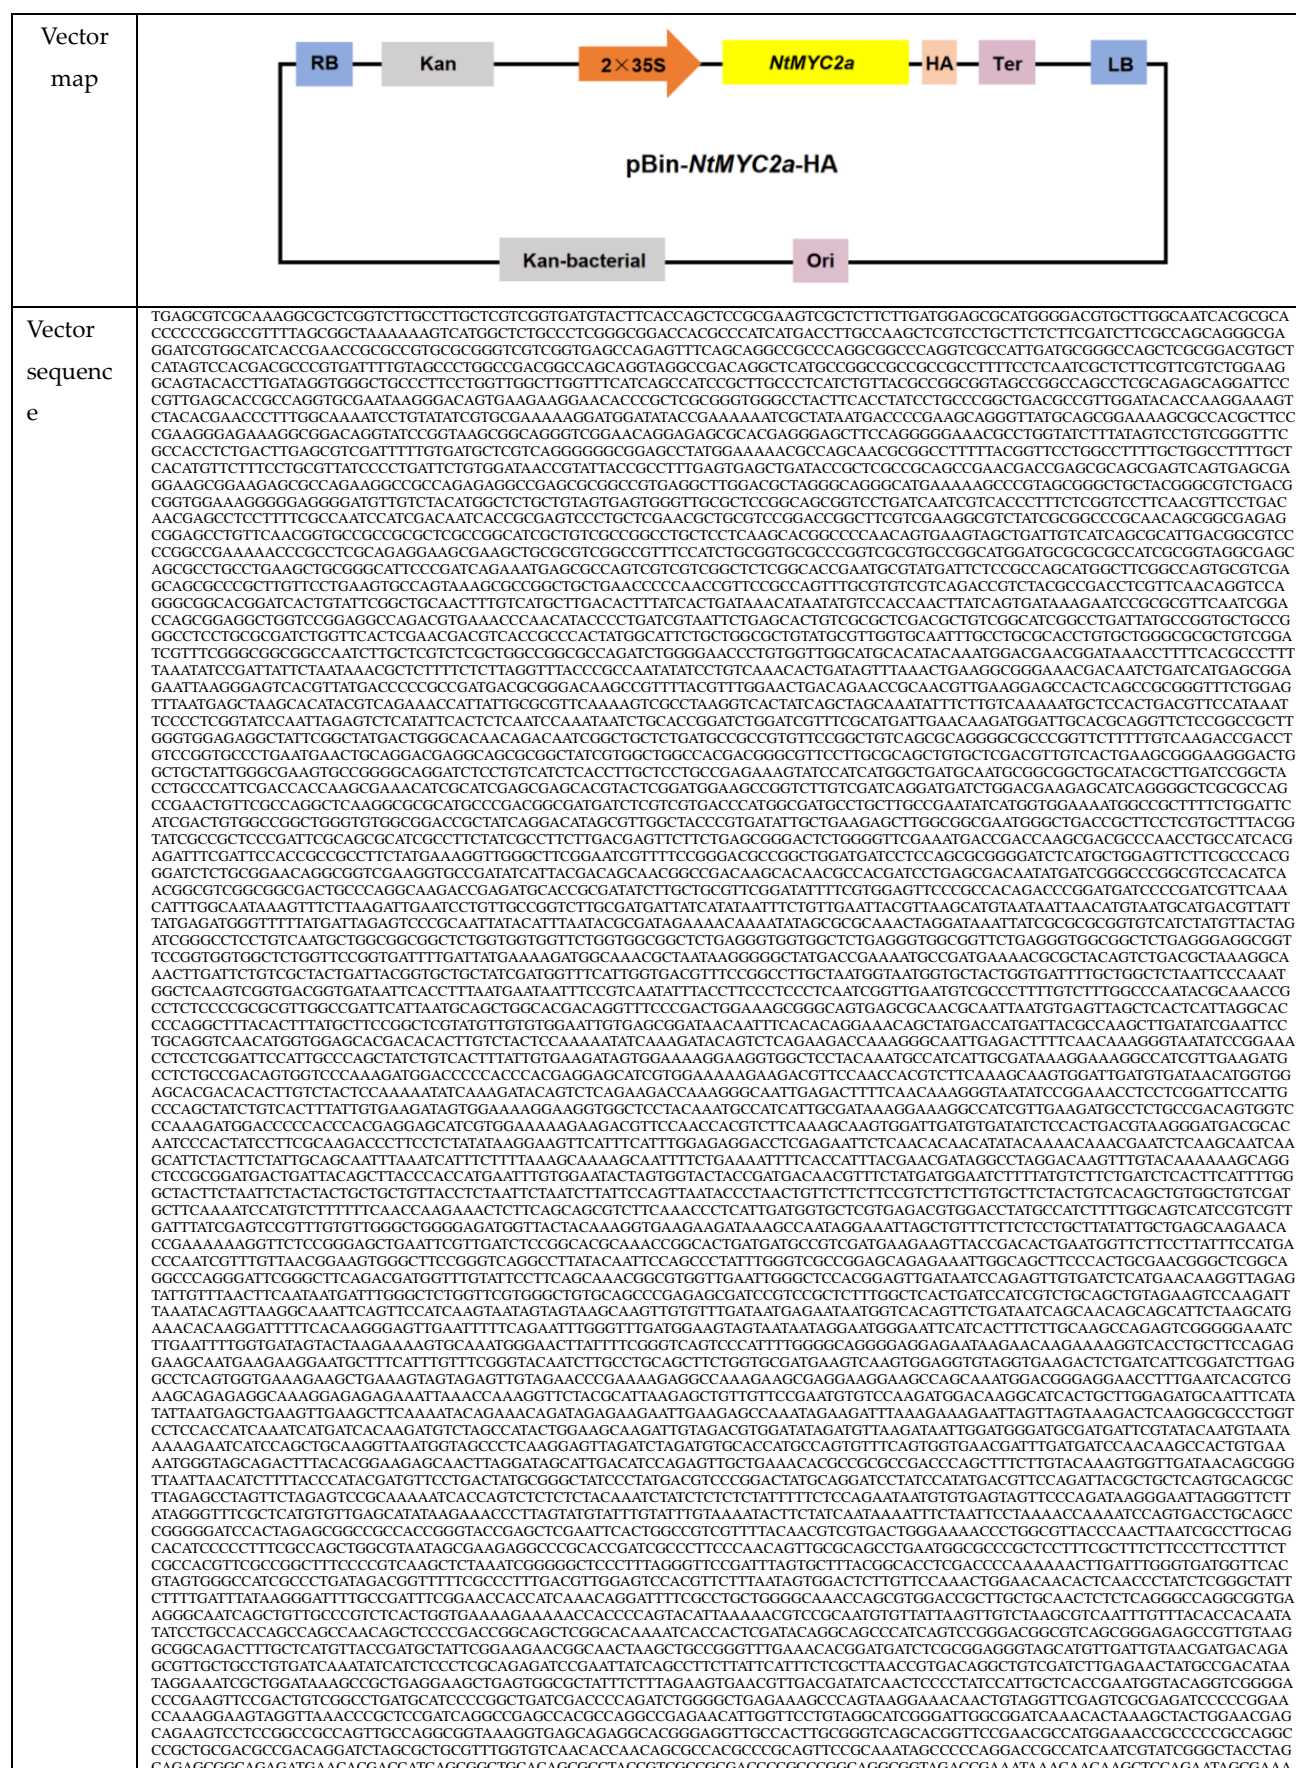

|  |                                                                                                                                                                                                                                                                                                                                                                                                                                                                                                                                                                                                                                                                                                                                                                                                                                                                                                                                                                                                                                                                                                                                                                                                                                                                                                                                                                                                                                                                                                                                                                                                                                                                                                                                                                                                                                                                                                                                                                                                                                                                                                                                                                                                                                                                                                                                                                                                                                                                                                                                                                                                                                                                                                                                                                                                                                                                                                                                                                                                                                                                                                                                                                                                                                                                                                                                                                                                                                                                                                                                                                                                                                                                                                                                                                                                                                                                                                                                                                                                                                                                                                                                                                                                                                                                                                                                                                                                                                                                                                                                                                                                                                                                                                                                                                                                                                                                                                                                                                                                                                                                                                                                                                                                                                                                                                                                                                                                                                                                                                                                                                                                                                                                                                                                                                                                                                                                                                                                                                                                                                                                                                                                                                                                                                                                                                                                                                                                                                                                                                                                                                                                                                                                                                              |
|--|--------------------------------------------------------------------------------------------------------------------------------------------------------------------------------------------------------------------------------------------------------------------------------------------------------------------------------------------------------------------------------------------------------------------------------------------------------------------------------------------------------------------------------------------------------------------------------------------------------------------------------------------------------------------------------------------------------------------------------------------------------------------------------------------------------------------------------------------------------------------------------------------------------------------------------------------------------------------------------------------------------------------------------------------------------------------------------------------------------------------------------------------------------------------------------------------------------------------------------------------------------------------------------------------------------------------------------------------------------------------------------------------------------------------------------------------------------------------------------------------------------------------------------------------------------------------------------------------------------------------------------------------------------------------------------------------------------------------------------------------------------------------------------------------------------------------------------------------------------------------------------------------------------------------------------------------------------------------------------------------------------------------------------------------------------------------------------------------------------------------------------------------------------------------------------------------------------------------------------------------------------------------------------------------------------------------------------------------------------------------------------------------------------------------------------------------------------------------------------------------------------------------------------------------------------------------------------------------------------------------------------------------------------------------------------------------------------------------------------------------------------------------------------------------------------------------------------------------------------------------------------------------------------------------------------------------------------------------------------------------------------------------------------------------------------------------------------------------------------------------------------------------------------------------------------------------------------------------------------------------------------------------------------------------------------------------------------------------------------------------------------------------------------------------------------------------------------------------------------------------------------------------------------------------------------------------------------------------------------------------------------------------------------------------------------------------------------------------------------------------------------------------------------------------------------------------------------------------------------------------------------------------------------------------------------------------------------------------------------------------------------------------------------------------------------------------------------------------------------------------------------------------------------------------------------------------------------------------------------------------------------------------------------------------------------------------------------------------------------------------------------------------------------------------------------------------------------------------------------------------------------------------------------------------------------------------------------------------------------------------------------------------------------------------------------------------------------------------------------------------------------------------------------------------------------------------------------------------------------------------------------------------------------------------------------------------------------------------------------------------------------------------------------------------------------------------------------------------------------------------------------------------------------------------------------------------------------------------------------------------------------------------------------------------------------------------------------------------------------------------------------------------------------------------------------------------------------------------------------------------------------------------------------------------------------------------------------------------------------------------------------------------------------------------------------------------------------------------------------------------------------------------------------------------------------------------------------------------------------------------------------------------------------------------------------------------------------------------------------------------------------------------------------------------------------------------------------------------------------------------------------------------------------------------------------------------------------------------------------------------------------------------------------------------------------------------------------------------------------------------------------------------------------------------------------------------------------------------------------------------------------------------------------------------------------------------------------------------------------------------------------------------------------------------------------------------------------------|
|  | <p>TATTAAGTGC GCCGAGGATGAAGATGCGCATCCACCAGATTCCCGTTGGAATCTGTGCGACGATCATCAGAGCAATAAACCCGCCGGCAACGCCGCAGCAGCATACCGGGCAC<br/>CCCTCGGCCTCGCTGTTTCGGGCTCCACGAAAACGCCGGACAGATGCGCCTTGTGAGCGTCTTGGGGCCGTCTCCTGTTTGAAGACCGACAGCCCAATGATCTCGCGTCGATG<br/>TAGGGCCGCAATGCCACGGCATCTCGCAAACCGTTACAGCGAACGCCCTCCATGGGCTTTTCTCCTCGTGCTCGTAACCGGACCCGAACATCTCTGGAGCTTCTTTCAGGGCCGACA<br/>ATCGGATCTCGCGGAAATCCTGCACTGCGCGGCTCCAAAGCCGTCGAATCTGAGCCTTAATCACAATTGTCAAATTTAATCCTCTGTTTATCGGCAGTCTGTAGAGCGCGCGGTGCG<br/>TCCCGAGCGATACTGAGCGAAGCAAGTGCCTGAGCAGTGCCCGCTTGTCTCTGAAATGCCAGTAAGCGCTGGCTGCTGAACCCCCAGCCGGAACATGACCCCAAGGGCCTTA<br/>GGCTTTGCAATGCACCAAGGTCTCATTTGACCAGGCGTGTTCACACAGGCCGCTGCCCTCGCAACTCTTCGCAAGCTTCGCCGAGCTGCTCGCGCCACTCTTTCACGGCGGGTGAA<br/>TCCGATCCGCAATGAGCGGGAAGGTTTCCAGCTTGAGCGGGTACGGCTCCCGGTGCGAGCTGAAATAGTTCGAACATCCGTCGGGCCGTTCGGGCACAGCTTGCGGTACTTCTCC<br/>ATATGAATTCGTGTAGTGGTCGCCAGCAAAACAGCACGACGATTTCTCTGCTCAGGAACCTGCAACCGGACGTTTCTTGCCACGGTCCAGGACGGGAAGCGGTGACAGAG<br/>CGACACCGATTCCAGGTGCCAACCGCGTTCGACGTGAAGCCATCGCCGTCGCGTGTAGGCGCGACAGGCATTCTCGGCCCTTCGTGTAATACCGGCCATTGATCGACACGCC<br/>AGGTCTGGCAAAGCTCGTAGAACGTGAAGGTGATCGGCTCGCGGATAGGGGTGCGCTTCGCGTACTTCCAACACCTGCTGCCACACCAAGTTCGTATCTCGCGCCGCGAGCTCGA<br/>CGCCGGGTAGGTGATCTTACGTCTTGTGACGTGGAAAATGACCTTGTGTTTCAGCGCCTCGCGCGGATTTCTGTTGCGCGTGGTGAACAGGGCAGAGCGGGCGGTGTC<br/>GTTTGGCATCGCTCGCATCTGTTCGGGCCACGGCGCAATATCGAACAAGGAAAGCTGCATTTCCTTGATCTGCTGCTTCGTGTGTTTCAGCAACCGCGGCTGCTTGGCCTCGGTGA<br/>CCTGTTTTCGAGGTCTTCGCCGCGGTTTTTCGCTTCTTGGTCGTATAGTTCCTCGCGTGTGATGGTCAICGACTTCGCCAAACCTGCGCCTCTCTGTCGAGACGACGCGAA<br/>CGCTCCACGGCGCGGATGGCGCGGGCAGGGCAGGGGGAGCCAGTTGACGCTGTGCGCTCGATCTTGGCCGTAGCTTGTGAGCAATCGAGCCGACGGACTGGGAAGGTTTCG<br/>CGGGGCGCACGATGACGGTGGCGCTTGCATGGTTTCGGCATCTCGCGCGGAAAACCCCGCTCGATCAGTTCTTGCCGTGTATGCCCTTCGGTCAAACGTCGCTTCACTCC<br/>TCCTTTCGGGATTCGCCGACTCACGCCGGGGCAATGTGCCCTTATTCCTGATTGACCCGCTGGTGCCCTTGGTGTCCAGATAATCCACCTTATCGGCAATGAAGTCGGTCCCGTA<br/>GACCGTCTGGCGCTCTTCTCGTACTTGGTATTCGGAATCTTGCCCTGCACGAATACCAAGCGACCCCTTGCCCAAATACTTGGCGTGGGCTCGGCTGAGAGCCAAAACACTTGA<br/>TGCGGAAGAAGTCGGTGCCTCTGCTTGTGCGCGCATCGTTGCGCCACATCTAGGTACTAAAAACAATTCTCCAGTAAAAATATAATTTATTTTCTCCCAATCAGGCTTGATCC<br/>CCAGTAAGTCAAAAAATAGCTCGACATACTGTTCTTCCCGATATCTCCTCGATCGACGGGACGCAAGAGCAATGTCATACCACTTGTCCGCTCGCCGCTTCTCCCAAGATCAA<br/>TAAAGCCACTTACTTTCGCAATCTTTCACAAAGATGTTGCTGTCTCCAGGTTCGCCGTGGGAAAAGACAAAGTTCCTCTTCGGGCTTTTCGCTCTTAAAAATCATACAGCTCGCGC<br/>GGATCTTTAAATGGAGTGTCTTCTTCCAGTTTCGCAATCCACATCGGCCAGATCGTTATTCAGTAAGTAATCCAAATCGGCTAAGCGGCTGTCTAAGCTATTCTGATAGGGACAAT<br/>CCGATATGTCGATGGAGTGAAGAGCTGATGCACTCCGCAATACAGCTCGATAATCTTTTCAGGGCTTTGTTCACTTTCATATCTTCCGAGCAAGGACGCCATCGGCTCACTCA<br/>TGAGCAGATTGCTTCAGCCATCATGCCGTTCAAGGTGCAAGGACCTTTTGGAAACAGGCAGCTTCTCCTCAGCCATAGCATCATGCTTTTCCCGTTCACATCATAGAGGTCCTCT<br/>TATACCGGCTTCGCTCAITTTTAAATATAGGTTTTCATTTTCTCCACACAGCTTATATACCTTACAGAGGACATTCCTTCCGTATCTTTTACGCGAGCGGTATTTTCGATACGTTTTT<br/>TCAATTCGGGTGATATTTTACCAATTTATTAATTTTCTTCTCTTTCTACAGTATTTAAAGATACCCCAAGAAGCTAATTAACAAAGACGAACCTCAATTTCACTGTTCTTGC<br/>ATTCTAAACCTTAAATACCAAGAAAACAGCTTTTTCAAAGTTGTTTTCAAAGTTGGCGTATAACATAGTATCGACGGAGCCGATTTTGAACACCAATATGAGGTGATGCTGCAAC<br/>TACTGATTTAGTGATATGTTGTTTTGAGGTGCTCCAGTGGCTTCTGTGCTATCAGCTGTCCCTCTCTGTTCAAGTACTGACGGGTGGTGGCTAACGGCAAAAAGCACCGCCG<br/>GACATCAGCGCTATCTGCTCTCACTGCCGTAACATGCGCACTGCAAGTTCATCTACACCGCTTCTCAACCCGGTACGACCCAGAAAATCATGATATGCCATGAATGGCGTT<br/>GGATGCCGGGCAACAGCCCGCATATGGCGCTTGGCTCAACACGATTTTACGTCACTTAAAAAACTCAGGCCGCAAGTCGGTAACCTCGCGCATACAGCCGGGCAAGTACGCTAT<br/>CGCTGCGCGGAAATGGACGAACAGTGGGGCTATGTCGGGGCTAAATCGCGCCAGCGCTGGCTGTTTACGCTTGGGAGCTCTCCCATATGGTGACCTGCAAGCGCGCCGCGAA<br/>TTCATAGTGATACCCCATATGTGATCAATTCGGGCGACGAACCCAGTGGACATAAGCCTCGTTCGGTTCGTAAGCTGTAATGCAAGTAGCGTAACCTGCCGTACGCAACTGGTCCA<br/>GAACCTTGACCGAACGCGAGCGGTGGTAACGGCGCAGTGGCGTTTTTATGGCTTCTGTTATGACATGTTTTTTTGGGGTACAGTCTATGCTCGGGCATCAAGCAAGCAAGCGCG<br/>TTACCGCGTGGGTTCGATGTTTGTATGTTATGGAGCAGCAACGATGTTACGCAAGGGCAGTCGCCCTAAACAAAGTTAAACATCATGAGAGAAAAATCACTGGATATACCACC<br/>GTTGATATATCCCAATGGCATGTAAGAACAATTTTGAAGCATTTTCACTAGTTGCTCAATGTACCTATAACAGACCGGTTACGCTGGATATTACGGCCTTTTAAAGACCGGTAAAGA<br/>AAAATAAGCAACAAGTTTATCCGGCTTTTATTCACATTTCTGCCCGCTGATGAATGCTCATCCGAGTTCGGTATGGCAATGAAGACGGGTGAGCTGGTGATATGGGATAGTGTTC<br/>ACCCTTGTACACCGTTTTTCCATGAGCAAACTGAAACGTTTTTCATCGCTCTGGAGTGAATACCAACGACGATTTCCGGCAGTTTCTACACATATATTCGCAAGATATGGCGTGTACG<br/>GTGAAAACCTGGCCTATTTCCCTAAAGGGTTATTGAGAAATATGTTTTTCGTCTCAGCAATCCCTGGGTGAGTTTACCAAGTTTGTATTTAAACGTGGCCAAATATGGACAACCTTCT<br/>CGCCCCCGTTTTTACAATGGGCAATATTATACGCAAGGGCGACAAGGTGCTGATGCCGCTGGCGATTACAGGTTATCATGCGCTTGTGATGGCTTCCATGTCGGCGAGAATGCTTAA<br/>TGAATTAACAACGTAAGTGCATGAGTGGCAGGGCGGGCGTAATTTTTTAAAGGCAGTTATTTGGTGGCATCTCTAGCTAGAAATTCGTTCAAGCCGACGCGCTTCGCGCGCGTT<br/>AACTCAAGCGATTAGATGCACTAAGCACATAATTGCTCACAGCCAAACTATCAGGTCAAGTCTGCTTTTATTAATTTTAAAGCGTGCATAATAAGCCCTACGCGTATGACAGTCTCCGG<br/>AAGACGGTGTGTCGCGACGTAATTCGGTGAACGCACTATGGCGAGCTGCGGGCTTATGAGCTGTCTGTACCCCTTTGACGCTGGTGATATGGATACGGATGGCTGGCGCTGTGA<br/>TGAATCCCGCTGAAGGGAAAGCTGCAGTAATCAGCAAGCGATATACGAGGGAATTGAGCGGCATAACCTGAATCTGAGGCGACACCTGGGACCGGTGGGACGGAAGTCGCT<br/>GTCTGTCTCAAAATCGGTGAGCTGCATGACAAAGTCATCGGGCATTTCTGAACATAAAACACTATCAATAAGTTGGAGTCAATACCAATATGATAGAAATTTACAAGCTATAAG<br/>GTTATGTCTCGGTTTTCAAGCAATAGTCCATGCAAGTTTTTATGCTTTGGCCATTCTATAGATATATTGATAAGCGCGCTGCTATGCTTGGCCCTTGAATCTCTTACATACGGCGAT<br/>ATCTTCTATATAAAAGATATATATCTTATCAGTATTTGCAATATTTCAAGGCAATCTGCCCTCTCATCTCTTCTATCTCTTCTGCTTGGTAGCTTTTAAATATGGCGCTTCTATAGAG<br/>TAATCTGTAAAAGGTCCAATTTCTCGTTTTTCATACCTCGGTATAATCTTACCTATCACCTCAAATGGTTTCGCTGGGTTTTATCGCACCCCCCAACACGAGCACGGCACCCCGACCACTA<br/>TGCCAAAGATGCCAAGGTAAAAATGCGCGCCCCGCCATGAAGTCCGTGAATGCCCCGACGGCCGAAGTGAAGGGCAGGGCCGCCACCAAGGCCGCCGCCCTCACTGCCCCGGC<br/>ACCTGGTCTGCTGAATGTGCTGACGACCTGCGGCACGTCAATGCTTCCGGCGTCGCGCTCGGGCTGATCGCCATCCCGTTACTGCCCCGATCCCGGCAATGGCAAGGACTG<br/>CCAGCGCTGCCATTTTGGGGTGAAGCCGTTTCGCGGCCGAGGGGCGCAGCCCTTGGGGGATGGGAGGCCCGGTTAGCGGGCCGGGAGGGTTCGAGAAGGGGGGGCACCCC<br/>CTTCGGCGTGGCGGTACGCGCACAGGGCGCAGCCCTGGTTAAAAACAAGGTTTATAAATATTTGGTTTAAAGCAGGTTAAAGAGCAGGTTAGCGGTGGCCGAAAAACGGGCG<br/>GAAACCCCTTGCAAAATGCTGGATTTTCTGCTGTGGACAGCCCTCAAATGTCAATAGGTGCGCCCTCATCTGTGACGACTCTGCCCCCTCAAGTGTCAAGGATCGCGCCCTCATC<br/>TGTGATGATGCGCCCCCTCAAGTGTCAATACCGCAGGGCACTTATCCCCAGGCTTGTCCACATCATCTGTGGGAAACTCGCGTAAATCAGGCGTTTTTCGCCGATTTGCGAGGCT<br/>GGCCAGCTCCACGTGCGCGGCCGAAATCGAGCTGGCCCTCATCTGTCAACGCCGCGCGGGTGAGTCGGCCCTCAAAGTGTCAACGTCGCCCCCTCATCTGTGATGAGGGCC<br/>AAGTTTTCCGCGAGGTATCCACAACGCCGGCGCGCGGTGTCTGCACACGGCTTCGACGGCGTTTTCGCGCGTTTGCAGGGCATAGACGGCCGACGCCAGCGCGAGG<br/>GCAACCGCCCGG</p> |
|--|--------------------------------------------------------------------------------------------------------------------------------------------------------------------------------------------------------------------------------------------------------------------------------------------------------------------------------------------------------------------------------------------------------------------------------------------------------------------------------------------------------------------------------------------------------------------------------------------------------------------------------------------------------------------------------------------------------------------------------------------------------------------------------------------------------------------------------------------------------------------------------------------------------------------------------------------------------------------------------------------------------------------------------------------------------------------------------------------------------------------------------------------------------------------------------------------------------------------------------------------------------------------------------------------------------------------------------------------------------------------------------------------------------------------------------------------------------------------------------------------------------------------------------------------------------------------------------------------------------------------------------------------------------------------------------------------------------------------------------------------------------------------------------------------------------------------------------------------------------------------------------------------------------------------------------------------------------------------------------------------------------------------------------------------------------------------------------------------------------------------------------------------------------------------------------------------------------------------------------------------------------------------------------------------------------------------------------------------------------------------------------------------------------------------------------------------------------------------------------------------------------------------------------------------------------------------------------------------------------------------------------------------------------------------------------------------------------------------------------------------------------------------------------------------------------------------------------------------------------------------------------------------------------------------------------------------------------------------------------------------------------------------------------------------------------------------------------------------------------------------------------------------------------------------------------------------------------------------------------------------------------------------------------------------------------------------------------------------------------------------------------------------------------------------------------------------------------------------------------------------------------------------------------------------------------------------------------------------------------------------------------------------------------------------------------------------------------------------------------------------------------------------------------------------------------------------------------------------------------------------------------------------------------------------------------------------------------------------------------------------------------------------------------------------------------------------------------------------------------------------------------------------------------------------------------------------------------------------------------------------------------------------------------------------------------------------------------------------------------------------------------------------------------------------------------------------------------------------------------------------------------------------------------------------------------------------------------------------------------------------------------------------------------------------------------------------------------------------------------------------------------------------------------------------------------------------------------------------------------------------------------------------------------------------------------------------------------------------------------------------------------------------------------------------------------------------------------------------------------------------------------------------------------------------------------------------------------------------------------------------------------------------------------------------------------------------------------------------------------------------------------------------------------------------------------------------------------------------------------------------------------------------------------------------------------------------------------------------------------------------------------------------------------------------------------------------------------------------------------------------------------------------------------------------------------------------------------------------------------------------------------------------------------------------------------------------------------------------------------------------------------------------------------------------------------------------------------------------------------------------------------------------------------------------------------------------------------------------------------------------------------------------------------------------------------------------------------------------------------------------------------------------------------------------------------------------------------------------------------------------------------------------------------------------------------------------------------------------------------------------------------------------------------------------------------------------------------------|

**Supplementary Figure S2: pBin-*NtMYC2a* $\Delta$ -RI vector**

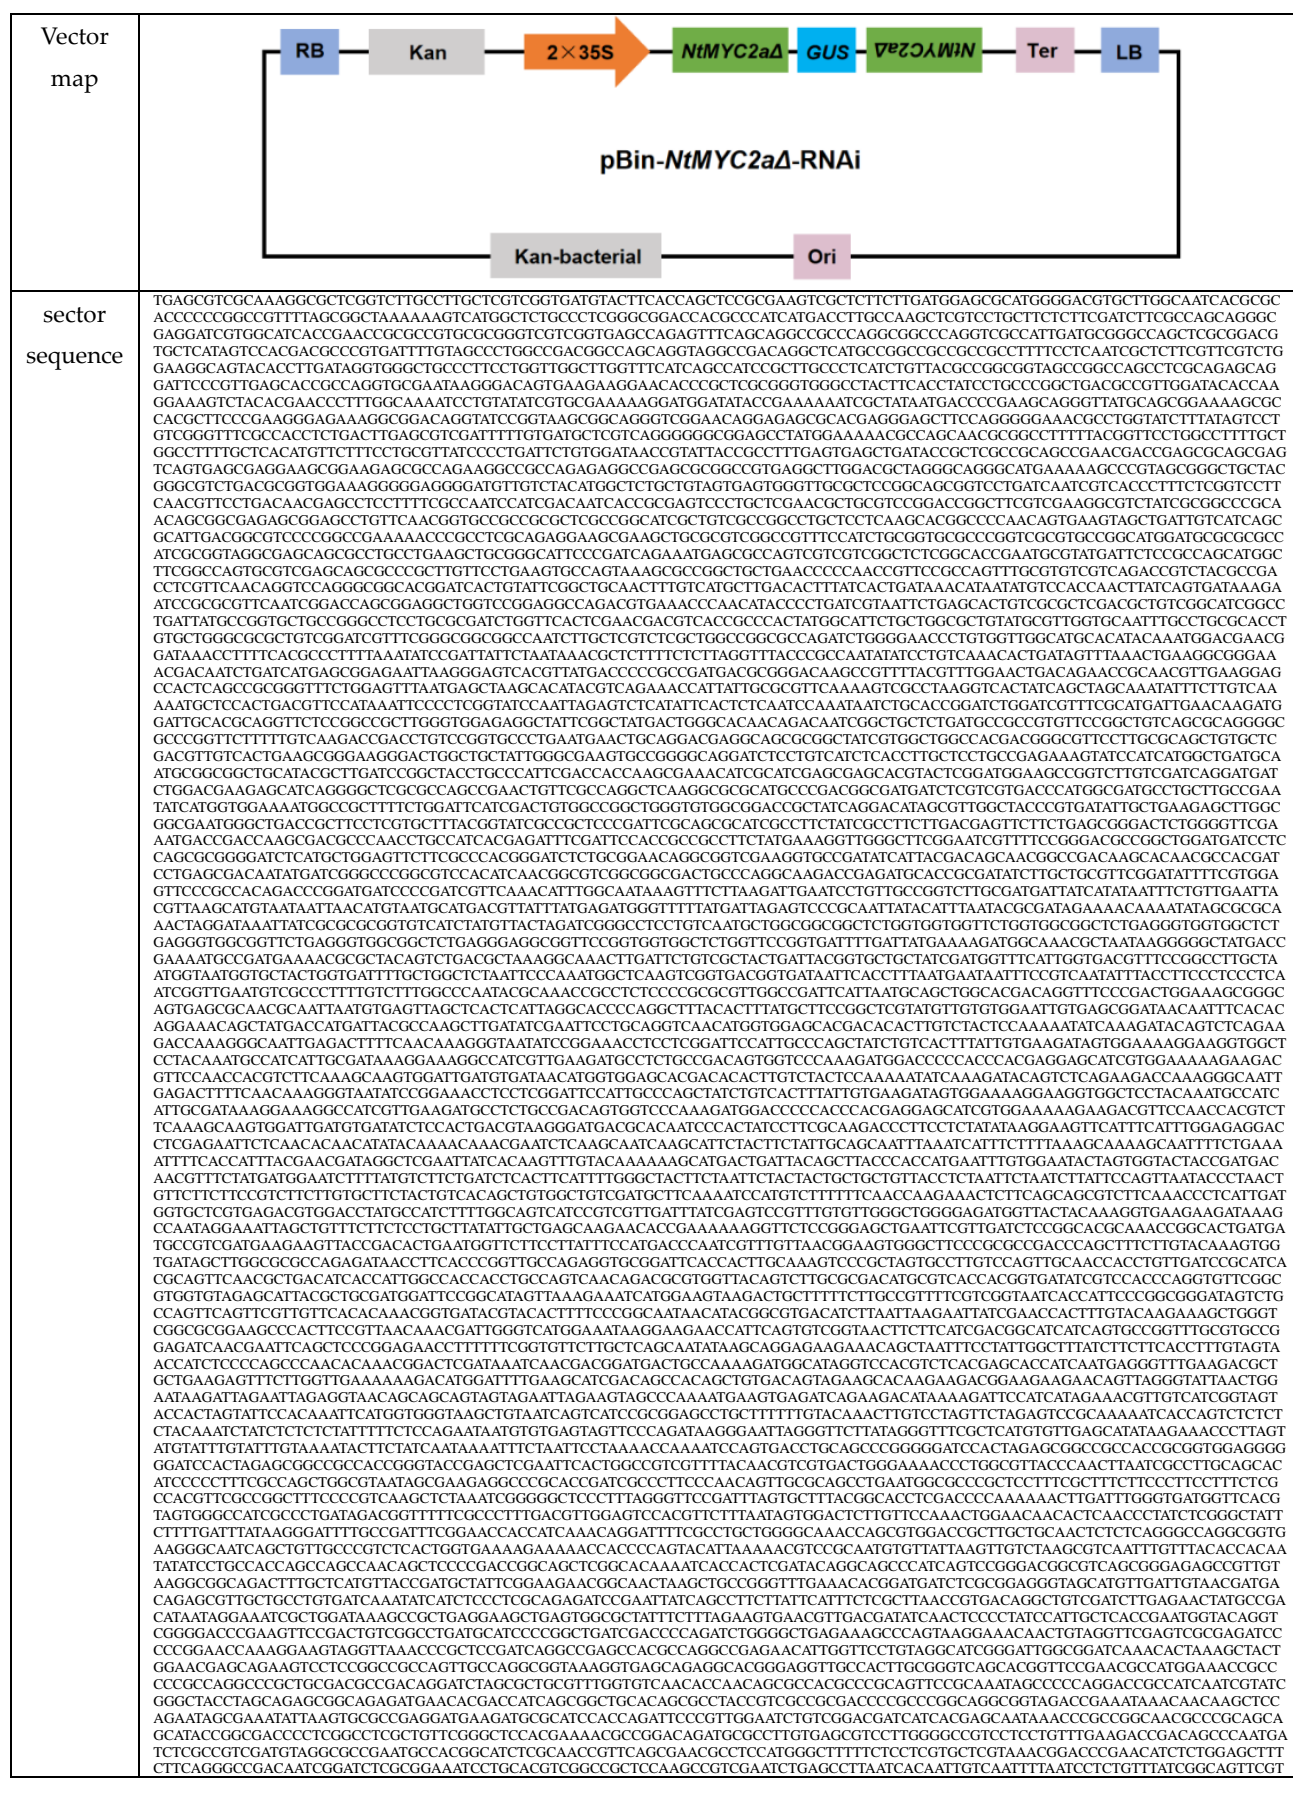

|  |                                                                                                                                                                                                                                                                                                                                                                                                                                                                                                                                                                                                                                                                                                                                                                                                                                                                                                                                                                                                                                                                                                                                                                                                                                                                                                                                                                                                                                                                                                                                                                                                                                                                                                                                                                                                                                                                                                                                                                                                                                                                                                                                                                                                                                                                                                                                                                                                                                                                                                                                                                                                                                                                                                                                                                                                                                                                                                                                                                                                                                                                                                                                                                                                                                                                                                                                                                                                                                                                                                                                                                                                                                                                                                                                                                                                                                                                                                                                                                                                                                                                                                                                                                                                                                                                                                                                                                                                                                                                                                                                                                                                                                                                                                                                                                                                                                                                                                                                                                                                                                                                                                                                                                                                                                                                                                                                                                                                                                                                                                                                                                                                                                                                                                                                                                                                                                                                                                                                                                                                                                                                                                                                                                                    |
|--|------------------------------------------------------------------------------------------------------------------------------------------------------------------------------------------------------------------------------------------------------------------------------------------------------------------------------------------------------------------------------------------------------------------------------------------------------------------------------------------------------------------------------------------------------------------------------------------------------------------------------------------------------------------------------------------------------------------------------------------------------------------------------------------------------------------------------------------------------------------------------------------------------------------------------------------------------------------------------------------------------------------------------------------------------------------------------------------------------------------------------------------------------------------------------------------------------------------------------------------------------------------------------------------------------------------------------------------------------------------------------------------------------------------------------------------------------------------------------------------------------------------------------------------------------------------------------------------------------------------------------------------------------------------------------------------------------------------------------------------------------------------------------------------------------------------------------------------------------------------------------------------------------------------------------------------------------------------------------------------------------------------------------------------------------------------------------------------------------------------------------------------------------------------------------------------------------------------------------------------------------------------------------------------------------------------------------------------------------------------------------------------------------------------------------------------------------------------------------------------------------------------------------------------------------------------------------------------------------------------------------------------------------------------------------------------------------------------------------------------------------------------------------------------------------------------------------------------------------------------------------------------------------------------------------------------------------------------------------------------------------------------------------------------------------------------------------------------------------------------------------------------------------------------------------------------------------------------------------------------------------------------------------------------------------------------------------------------------------------------------------------------------------------------------------------------------------------------------------------------------------------------------------------------------------------------------------------------------------------------------------------------------------------------------------------------------------------------------------------------------------------------------------------------------------------------------------------------------------------------------------------------------------------------------------------------------------------------------------------------------------------------------------------------------------------------------------------------------------------------------------------------------------------------------------------------------------------------------------------------------------------------------------------------------------------------------------------------------------------------------------------------------------------------------------------------------------------------------------------------------------------------------------------------------------------------------------------------------------------------------------------------------------------------------------------------------------------------------------------------------------------------------------------------------------------------------------------------------------------------------------------------------------------------------------------------------------------------------------------------------------------------------------------------------------------------------------------------------------------------------------------------------------------------------------------------------------------------------------------------------------------------------------------------------------------------------------------------------------------------------------------------------------------------------------------------------------------------------------------------------------------------------------------------------------------------------------------------------------------------------------------------------------------------------------------------------------------------------------------------------------------------------------------------------------------------------------------------------------------------------------------------------------------------------------------------------------------------------------------------------------------------------------------------------------------------------------------------------------------------------------------------------------------------------------------|
|  | AGAGCGCGCCGTGCGTCCCAGCGATACTGAGCGAAGCAAGTGCCTCGAGCAGTGCCCGCTTGTCTGAAATGCCAGTAAGCGCTGGCTGCTGAACCCCAAGCCGGAAC<br>GACCCCAAGGCCCTAGCGTTTGCAATGCACCAAGGTCATCATTTGACCCAGGCGTGTTCACCAAGGCCGCTGCCTCGCAACTCTTCGAGGCTTCGCCGACCTGCTCGGCCAC<br>TTCTTCACGCGGGTGGAAATCCGATCCGCACATAGAGCGGAAGGTTTCAGCTTGAGCGGGTACGGCTCCCGGTGCGAGCTGAAATAGTGCACACATCCGTCGGGGCGTCGGCGAC<br>CAGCTTTCGGTACTTCTCCCATATGAATTTCTGTAGTGGTTCGCCAGCAAACAGCAGCAGCAGATTTCTCTGTCGATCAGGACCTGGCAACGGGACGTTTTCTTGCCACGGTCCAGG<br>ACGCGGAAGCGGTGCACGACGCGACACCGATTCCAGGTGCCAACGCGGTTCGACGTGAAGCCCATCGCCGTCGCTGATAGGCGCGACAGGCATTCTCGGCCCTTCGTGTAATA<br>CCGGCCATTGATCGACCAAGCCAGGTCCTGGCAAAGCTCGTAGAACGTGAAGGTGATCGGCTCGCCGATAGGGGTGCGCTTCGCGTACTTCCAACACCTGCTGCCACACCAAGTTC<br>GTACTGTCGGCCCGCAGCTCGACGCGGTGTAGGTGATCTTCACGTCCTTGTGTACCGTGGAAATGACCTTGTTTTCGAGCGCTCGCCGGGATTTCTTGTGTGGCGGTGGTG<br>AACAGGCGACAGCGGGCGGTGCTGTTTGGCATCGCTCGCATCGTGTCCGGCCACGGCGCAATTCGAACAAGGAAAGCTGCAATTCCTTGATCTGCTGCTTGTGTTTTCAG<br>AACCGCGCTGCTTGGCTTCGCTGACCTGTTTGGCAAGTCTCGCCGGCGGTTTTTCGCTTCTTGGTCTGATAGTTCCTCGCGTGTCGATGGTCACTGACTTCGCCAAACCTG<br>CCGCTCTCTGTTCCGAGACGACGCGAAACGCTCCACGGCGGCCGATGGCGGGGACGGGCGAGGGGAGCCAGTTGCACGCTGTCGCGCTCGATCTTGGCGTAGCTTGTGTGGAC<br>ATCGAGCCGACGGACTGGAAGGTTTCGGGGGGCGCACGCATGACGGTGGCGGTTGCGGATGTTTCGGCATCTCGGCCGAAAAACCCGCGTCGATCAGTTCTTGCCTGTATGCC<br>TTCCGGTCAAACGTCGGATTATTCACCTCCTTTCGGGGATTTCGCCGACTCACGCGGGGCAATGTGCCCTTATTCCTGATTGACCCGCTGGTGGCTTGGTGTCCAGATAATC<br>CACCTTATCGGCAATGAAGTCGGTCCGTGAGCCGCTCGGCCGCTCTTCTGTAATCTGGGATTCGGAATCTTGCCTGCAAGAAATACCAGCGACCCCTTGGCCAAATCTTGGCGT<br>GGGCTTCGGCTGAGAGCCAAACACTGTATCGGGAAGAAGTCGGTGGCTCTGCTTGTTCGCCGGCATCGTTCGCCACATAGGTACTAAACAATTCATCCAGTAAATA<br>TAATATTTTATTTTCTCCCAATCAGGCTTGATCCCCAGTAAGTCAAAAAATAGCTCGACATACTGTTCTTCCCGATATCTCCCTGATCGACCGGACGAGAAAGGCAATGTCATAC<br>CACTTGTCCGCCCTGCCGCTTCTCCCAAGATCAATAAAGCCACTTACTTGGCACTTTTCAAAAGATGTTGCTGCTCCTCCAGGTTCGGCGTGGGAAAAAGCAAGTTCTCTTCGG<br>GCTTTTCGCTCTTAAAAAATCATACAGCTCGCGCGGATCTTTAAATGGAGTGTCTTCTTCCAGTTTTTCGCAATCCACATCGGCCAGATCGTTTACGTAAGTAATCCAATTCGG<br>CTAAGCGGCTGTCTAAGCTATTCGTATAGGACAATCCGATATGTCGATGGAGTGAAGAGGCTGATGCACTCCGATACAGCTCGATAATCTTTTACAGGCTTGTGTCATCTTCAT<br>ACTCTTCCGAGCAAAAGGACGCCATCGGCCTCACTCATGAGCAGATTGCTCCAGCCATCATGCGGTTCAAAGTGCAGGACCTTGGAAACAGGCACTTTCCTTCCAGCCATAGCA<br>TCATGTCCTTTTCCCGTTCACATCATAGGTGGTCCCTTTATACCGGCTGTCGCTCATTTTAAATATAGGTTTTCATTTTCTCCACAGCTTATATACCTTAGCAGGAGACATTCCT<br>TCCGTATCTTTTACGACGCGGTATTTTTCGATCAGTTTTCATTCGCGGTGATTTCTCATTTTACGCAITTAITATTTCTTCTCTTTTACAGTATTTAAAGATACCCCAAGAA<br>CTAATTATAACAGACCAACTCCAATTCACTGTTCCTTGCATTCTAAACCTTAAATACCAGAAAAACAGCTTTTCAAAGTTGTTTCAAAGTTGGCGTATAACATAGTATCGACG<br>GAGCGGATTTTGAACCAACAATTATGGGTGATGCTGCCAACTTACTGATTAGTGTATGATGGTGTTTTGAAGTGTCTCCAGTGGCTCTGTGTCTATCAGCTGTCCCTCTCTGTTCA<br>GCTACTGACGGGGTGGTGGCTAACGGCAAGCACCGCGGACATCAGCGCTATCTCTGCTCACTGCGCTAAACATGGCAACTGCACTTACACCGCTTCTCAACCC<br>GGTACGCCACAGAAAAATCGATATGGCCATGAATGGCGTTGGATGCCGGGCAACAGCCCGCAATTATGGGCGTGGGCTCAACACGATTTACGTACATTAATAAACTCAGGCC<br>CGAGTCGGTAACCTCGCGCATACAGCGGGCAGTGACGTCATCGTCTCGCGGAAATGGACGAACAGTGGGGCTATGTCGGGGCTAAATCGCGCCAGCGCTGGCTGTTTACGC<br>GTTGGGAGCTCTCCCATATGGTCGACCTGCAGGCGGCCGGAATTCAGTATGATACCCCATATGTGATCAATTCGGGCACGAACCCAGTGGACATAAGCTCGTGTGCTGTTCGTA<br>AGCTGTAATGCAAGTAGCGTAAGTCCGCTCAGCGCAACTGGTCCAGAACCTTGACCGGAACGCGAGCGGTGGTAACGGCGCAGTGGCGGTTTTATGCGCTTCTGTTATGACATGTT<br>TTTTTGGGGTACAGTCTATGCTTCGGGCATCCAAGCAGCAAGCGCGTTACGGCGTGGGTGATGTTTGAATGTTATGGAGCAGCAACGATGTTACGCAAGCGGCAAGTGGCTGATGCGCGTGG<br>AAAAAAGTTAAACATCATGAGAGAAAAAATCACTGGATATACCAACCGTTGATATATCCCAATGGCATCGTAAAGAAACATTTTAGGCGATTTCAGTCAAGTTGCTCAATGTACCTAT<br>AACCAGACCGTTCAGCTGGATATTACGGCCTTTTAAAGACCGTAAAGAAAAAATAGCACAAAGTTTATCCGCGCTTATTCACATCTTTCGCCCGCTGATGAATGCTCATCCGGA<br>GTTCCGTATGGCAATGAAGACGGTGAAGTGGTGATATGGGATAGTGTTCACCTTGTGTACACCGTTTTCCATGAGCAAACTGAAACGTTTTATCAGCTCTGGAGTGAATACCCAC<br>GACGATTTCCGGCAGTTTCTACACATATATCGCAAGATGTGGCGTGTTCAGGTGAAAACTGGGCTATTTCCCTAAAGGGTTTATGAGAATATGTTTTTCGCTCTAGCCAAATCCC<br>TGGGTGAGTTTACCAGTTTTGATTTAAACGTGGCCAATATGGCAACTTCTTCGCCCCGTTTTTACAATGGGCAAAATATATACCGCAAGGCGACAAGGTGCTGATGCGCGTGG<br>CGATTCAGGTTTATCATGCCGTTTGTGATGGCTTCCATGTCCGCAGAAATGCTTAATGAATACAAACAGTACTGCGATGAGTGGCAAGGCGGGGCGTAATTTTTTAAAGCAGTTAT<br>TGGTGGCATCTCTAGCTAGAAATTCGTTCAAGCCGACGCCGCTTCGCCGGCGTTAACTCAAGCGATTAGATGCACATAAGCACATAATTGCTCAGACCCAACTATCAGGTCAAG<br>TCTGCTTTTATATTTTTTAAAGCGTGCATAATAAGCCCTACGCGTATGACAGTCTCCGGAAGACGGTGTGTGCGCACGTATTCGGTGAACGCACTATGGCGACGCTGGGCGCTCTTA<br>TGAGCCTGCTGTACCCCTTTGACGTGGTGATATGGATGACGGATGGCTGGCGCTGTATGAATCCCGCTGAAGGGAAAGCTGCACGTAATCAGCAAGCGATATACGACGCAAT<br>TGAGCGGCATAAAGTGAATCTGAGGCGACACCTGGCAGCGCTGGGACGGAAGTTCGCTGTCGTTCTCAAAATCGGTGGAGCTGCATGACAAAGTCAATCGGCAATATCTGAACAT<br>AAAACTATCAATAAGTTGGAGTCAATACCCAATTATGATAGAATTTACAAGCTATAAGGTTTATGTCCTGGGTTTCAAGCATAGTCCATGCAAGTTTTTATGCTTTTGGCCATTCT<br>ATAGATATGATGAAGCGCGCTGCCTATGCTTGCCTTGAATCCTTACATACGCGGATATCTTCTATATAAAAGATATATATCTTATCAGTATTGTCAATATATTCAAGGCAATC<br>TGCCTCTCATCTCTTCTATCTCTTCTGCTTGGTAGCTTTTTAAATATGGCGCTTCATAGAGTAATCTGTAAAGGTTCCAATTCGTTTTCTATACCTCGGTATAATCTTACCTATCA<br>CTCAAAATGGTTTCGCTGGGTTTATCGCACCCCGGAACAGAGCAGCGGACCCGCGACCACTATGCCAAGAAATGCCCAAGGTAAATTTGCCCGGCCCGCATGAAGTCCGTGAA<br>TGCCCGACGCGCGGAAGTGAAGGGCAGGCCGCCACCCAGGCGCGCCCTCACTGCCCGGCACTGGTTCGCTGAATGTGATGTCAGTGCACGACCTTGCGGCACGTCAATGCTTCCGG<br>GCGTCGCGCTCGGCTGATCGCCCATCCCGTTACTGCCCCGATCCCGGCAATGGCAAGGACTGCCACGCGCTGCCATTTTGGGGTGAGGCGGTTCCGGGCGGAGGGGCGGACGCC<br>CTTGGGGGATGGGAGGCGCGGTTAGCGGGCGGGAGGGTTGAGAAAGGGGGGACCCCTTTCGGCGTGCAGGTCACGCGCACAGGGCGAGCCCTGGTTAAACAA<br>AGGTTTATAAATATGTTTAAAGCAGGTTAAAGACAGGTTAGCGGTGGCCGAAAAACGGGCGGAAACCCCTTGCAATGTCTGGAATTTCTGCTGTGGACAGCCCTCAAAAT<br>GTCAATAGGTGCGCCCTCATCTGTGACACTTGCCTTCAAGTGTCAAGGATCGCGCCCTCATCTGTGTCAGTAGTGCAGCCCTCAAGTGTCAATACCGCAGGGCACTTATCC<br>CCAGGCTTGTCCACATCATCTGTGGGAAACTCGGTAAATCAGGCGTTTTTCGGCATTTTCGAGGCTGGCCAGCTCCACGTCCGCGGCGGAAATCGAGGCTGCCCTCATCTG<br>TCAACGCGCGCGGGTGAGTCGGCCCTCAAGTGTCAACGTCCGCCCTCATCTGTGTCAGTGAAGGCGCAAGTTTTTCGCGAGGTATCCACAACGCCGGCGGGCGGTTGCTC<br>GCACAGGCTTCGACGGCGTTTTCTGGCGGTTTTGCAAGGGCATAGACGGCGCGCAAGCCAGGCGGAGGGCAACCAAGCCCGG |
|--|------------------------------------------------------------------------------------------------------------------------------------------------------------------------------------------------------------------------------------------------------------------------------------------------------------------------------------------------------------------------------------------------------------------------------------------------------------------------------------------------------------------------------------------------------------------------------------------------------------------------------------------------------------------------------------------------------------------------------------------------------------------------------------------------------------------------------------------------------------------------------------------------------------------------------------------------------------------------------------------------------------------------------------------------------------------------------------------------------------------------------------------------------------------------------------------------------------------------------------------------------------------------------------------------------------------------------------------------------------------------------------------------------------------------------------------------------------------------------------------------------------------------------------------------------------------------------------------------------------------------------------------------------------------------------------------------------------------------------------------------------------------------------------------------------------------------------------------------------------------------------------------------------------------------------------------------------------------------------------------------------------------------------------------------------------------------------------------------------------------------------------------------------------------------------------------------------------------------------------------------------------------------------------------------------------------------------------------------------------------------------------------------------------------------------------------------------------------------------------------------------------------------------------------------------------------------------------------------------------------------------------------------------------------------------------------------------------------------------------------------------------------------------------------------------------------------------------------------------------------------------------------------------------------------------------------------------------------------------------------------------------------------------------------------------------------------------------------------------------------------------------------------------------------------------------------------------------------------------------------------------------------------------------------------------------------------------------------------------------------------------------------------------------------------------------------------------------------------------------------------------------------------------------------------------------------------------------------------------------------------------------------------------------------------------------------------------------------------------------------------------------------------------------------------------------------------------------------------------------------------------------------------------------------------------------------------------------------------------------------------------------------------------------------------------------------------------------------------------------------------------------------------------------------------------------------------------------------------------------------------------------------------------------------------------------------------------------------------------------------------------------------------------------------------------------------------------------------------------------------------------------------------------------------------------------------------------------------------------------------------------------------------------------------------------------------------------------------------------------------------------------------------------------------------------------------------------------------------------------------------------------------------------------------------------------------------------------------------------------------------------------------------------------------------------------------------------------------------------------------------------------------------------------------------------------------------------------------------------------------------------------------------------------------------------------------------------------------------------------------------------------------------------------------------------------------------------------------------------------------------------------------------------------------------------------------------------------------------------------------------------------------------------------------------------------------------------------------------------------------------------------------------------------------------------------------------------------------------------------------------------------------------------------------------------------------------------------------------------------------------------------------------------------------------------------------------------------------------------------------------------------------------------------------------------------|
